**Original article**

***Risk Factors and Outcomes of Pulmonary Hemorrhage in Preterm Infants born before 32 weeks.***

Gieng Thi My Tran<sup>2</sup>, Nhat Phan Minh Nguyen<sup>1,4</sup>, Nguyen Phuoc Long<sup>6</sup>, Duc Ninh Nguyen<sup>7</sup>,  
Thu-Tinh Nguyen<sup>1,3,5\*</sup>.

**Affiliations**

<sup>1</sup>Department of Pediatrics, University of Medicine and Pharmacy at Ho Chi Minh City, Ho Chi Minh City, 700000, Vietnam. E-mail: [nhatnguyen@ump.edu.vn](mailto:nhatnguyen@ump.edu.vn)

<sup>2</sup>Department of Neonatology, Thien Hanh Hospital, Daklak Province, 630000, Vietnam. E-mail: [mygiengtranthi@gmail.com](mailto:mygiengtranthi@gmail.com)

<sup>3</sup>Neonatal Intensive Care Unit, Children's Hospital 2, Ho Chi Minh City, 700000, Vietnam.

<sup>4</sup>Neonatal Department, Children's Hospital 2, Ho Chi Minh City, 700000, Vietnam.

<sup>5</sup>University Medical Center, Ho Chi Minh City, 70000, Vietnam.

<sup>6</sup>Department of Pharmacology and Pharmacogenomics Research Center, Inje University College of Medicine, Busan 47392, Republic of Korea. E-mail: [phuoclong@inje.ac.kr](mailto:phuoclong@inje.ac.kr)

<sup>7</sup>Section for Comparative Pediatrics and Nutrition, Department of Veterinary and Animal Sciences, University of Copenhagen, Denmark. E-mail: [dnn@sund.ku.dk](mailto:dnn@sund.ku.dk)

**\*Corresponding Author:**

Tinh-Thu Nguyen, MD, PhD;

Department of Pediatrics,

University of Medicine and Pharmacy at Ho Chi Minh City,

217 Hong Bang Street, District 5, Ho Chi Minh City, 700000, Vietnam.

Tel: +84-937-911-277

E-mail: [tinhnguyen@ump.edu.vn](mailto:tinhnguyen@ump.edu.vn)

ORCID: 0000-0002-8198-3170

**Category of study:** Pediatric Research

## **Impact**

1. High incidence and mortality of pulmonary hemorrhage in preterm infants < 32 weeks' gestational age with respiratory distress in a Neonatal Intensive Care Unit in Vietnam.
2. Pulmonary hemorrhage should be considered in the clinical deterioration of preterm infants given invasive ventilation in the first 2-4 days of life.
3. Independent risk factors for pulmonary hemorrhage: intubation in the first 24 hours, coagulation disorders, and transfusion of blood products in the first 3 days of life.
4. Urgent need to seek diagnostic criteria for intraventricular hemorrhage as soon as pulmonary hemorrhage occurs.

1 **Abstract**

2 **Background:** Pulmonary hemorrhage (PH) is a catastrophic event associated with significant  
3 morbidity and mortality among preterm infants. Understanding PH risk factors in preterm  
4 newborns, particularly those in low-to-middle-income countries like Vietnam, remains  
5 limited. This study aimed to investigate the risk factors and short-term outcomes of PH in  
6 very preterm infants.

7 **Methods:** We conducted an observational study of newborns aged < 72 hours with  
8 gestational age < 32 weeks, admitted to our unit from April 1, 2018 to March 31, 2019.

9 **Results:** Of 118 recruited newborns, 28 (23.7%) had PH. The logistic regression analysis  
10 showed that intubation within 24 first hours, blood transfusion, and coagulation disorders  
11 within the first 3 days were risk factors for PH (aOR = 4.594, 95% CI = 1.200-17.593; aOR =  
12 5.394, 95% CI = 1.243-23.395 and aOR = 7.242 95% CI = 1.838-28.542, respectively). Intra-  
13 ventricular hemorrhage (IVH) and mortality rates were higher in patients with PH compared  
14 to those without ( $p < 0.001$ ). The length of invasive ventilation was longer in the PH group  
15 ( $p < 0.001$ ).

16 **Conclusion:** We have identified intubation, blood transfusion, and coagulation disorders  
17 shortly after birth as risk factors for PH in very preterm infants, which was associated with  
18 increased mortality and occurrence of IVH.

**Keywords:** blood coagulation disorders, blood transfusion, intratracheal intubation,  
premature, pulmonary hemorrhage.

19

## 20 **Introduction**

21 Pulmonary hemorrhage (PH) is a life-threatening condition with blood extravasation into the  
22 alveoli, causing significant morbidity and mortality in hospitalized preterm infants. It occurs  
23 in up to 1.2% of total live births<sup>1</sup>, with a particularly high incidence in preterm infants (up to  
24 5%)<sup>1</sup>. PH currently has no preventive treatment and is most commonly diagnosed during the  
25 first few days of life; its mortality rates could rise to 50%, especially in extremely preterm  
26 infants<sup>2</sup>. Its diagnostic criteria include the aspiration of secretions from the trachea or  
27 endotracheal tube<sup>3,4</sup>. The severity can vary from a mild, self-limited disorder to a massive,  
28 deteriorating, and end-stage syndrome. Upon PH diagnosis in preterm infants, invasive  
29 ventilation and prolonged intensive care are often required, further elevating the risks of other  
30 significant morbidity and mortality<sup>3,4,3</sup>. In preterm infants, it is often manifested from  
31 pulmonary edema and hemodynamically significant patent ductus arteriosus (hsPDA)<sup>3,4</sup>.  
32 Asphyxia, prematurity, intrauterine growth restriction, early-onset sepsis, patent ductus  
33 arteriosus, and surfactant replacement have been shown as major risk factors of PH in several  
34 geographical settings<sup>2-5</sup>. Awareness of PH risk factors may help clinicians realize the early  
35 symptoms and develop prompt strategies for PH management.

36 The already reported risk factors of PH in preterm newborns are variable across different  
37 settings. In Vietnam, PH incidence and associated factors are unknown. Therefore, this study  
38 aimed to explore the perinatal associated factors and short-term outcomes of PH in very  
39 preterm newborns in a neonatal intensive care unit (NICU) in Vietnam, which will provide  
40 future benefits for early triage and the management of critically ill patients.

## 41 **Materials and Methods**

### 42 **Study design**

This retrospective observational study was conducted at the NICU of the Children's Hospital  
1 (a level IV NICU) from April 1<sup>st</sup>, 2018 to March 31<sup>st</sup>, 2019 in Ho Chi Minh City, Vietnam.

The study protocol was reviewed and approved by the Institutional Review Board of Children's Hospital 1 (IORG0007285, FWA00009748, Approval number: 2784/QĐ-BVND1, On October 16<sup>th</sup>, 2019). Written informed consent was waived by the Institutional Review Board because this was a retrospective study. There was no patient contact, and some of the patients were deceased.

43 The inclusion criteria include: (i) gestational age at birth < 32 weeks, (ii) being admitted to  
44 the NICU within 72 hours following the birth, and (iii) absence of congenital anomalies,  
45 including congenital heart disease other than patent ductus arteriosus (PDA), structural  
46 anomalies of the gastrointestinal tract, and other anomalies requiring surgery. Patients  
47 developing PH prior to admission to our center were also excluded.

48 PH diagnosis was performed according to the international standard with hemorrhagic  
49 secretions aspirated from the trachea or endotracheal tube, accompanied by clinical  
50 deterioration, which included the requirement of intubation and ventilation or the need for an  
51 increased fraction of inspired oxygen (FiO<sub>2</sub>) by at least 10% <sup>3</sup>. A chest X-ray was also taken  
52 to confirm diffuse pulmonary infiltrates.

53 Information during the pregnancy and hospitalization was collected retrospectively from the  
54 medical notes. Maternal history including antenatal corticosteroids, complications of this  
55 pregnancy (gestational diabetes, pre-eclampsia/ eclampsia, hypertension, urinary infection),  
56 intrapartum fever. Neonatal baseline details including gender, gestational age (calculated  
57 from the first day of the last menstrual period or prenatal obstetric ultrasonography in the first  
58 trimester), birth weight, mode of delivery, small for gestational age (SGA < 10 percentile on  
59 Fenton chart), intubation within first 24h of age, treatment with surfactant, multiple doses of  
60 surfactant prior the onset of PH, coagulation problems within the first 3 days, blood  
61 transfusion within the first 3 days (prior the occurrence of PH), platelet count < 100000/mm<sup>3</sup>,  
62 hsPDA. Echocardiography was used to diagnose PDA by a cardiologist from day 3 – 7 and

63 repeated when needed. The hsPDA was managed by consensus among neonatologists and  
64 cardiologists, and oral ibuprofen or intravenous acetaminophen was given to close the PDA.  
65 Surgery was performed in cases of contraindications to ibuprofen/ acetaminophen or failed 2  
66 courses of ibuprofen/acetaminophen therapy.

67 The study's primary outcomes include the incidence of PH. Secondary outcomes include PH  
68 risk factors, the rate of mortality, IVH, retinopathy of prematurity (ROP) and  
69 bronchopulmonary dysplasia (BPD), length of invasive ventilation, and NICU stay in patients  
70 with vs. without PH. IVH was identified by cranial ultrasound and classified based on Papile  
71 criteria. ROP was screened by an ophthalmologist when infants were 4 weeks of age or 31  
72 weeks of postmenstrual age, whichever came last. BPD was defined as the requirement for  
73 oxygen supplementation at 36 weeks postmenstrual age or at 28 days old.

#### 74 *Statistical analysis*

75 The data were imported into Excel. Descriptive statistical analysis was used to describe the  
76 characteristics of preterm newborns and their mothers. The normally distributed results are  
77 reported as the mean and standard deviation (SD); the remaining results are reported as the  
78 median, interquartile range (IQR), or percentage. Chi-squared test, Mann-Whitney test,  
79 Fisher's test, Student's *t*-test, and logistic regression model were used for statistical analysis.  
80 Multiple logistic regression was applied to classify patients into the binary state of PH  
81 (Yes/No). Since the sample size was relatively small ( $N = 118$ ) and the PH class ratio was  
82 imbalanced ( $N_{\text{Yes}} = 28$ ,  $N_{\text{No}} = 90$ ), a  $\ell_2$ -penalization was applied to the logistic regression  
83 model to alleviate the potential bias in classification and coefficient estimation<sup>6</sup>. A nested *k*-  
84 fold cross-validation procedure was conducted to assess the performance of the classification  
85 model. The outer loop ( $k = 5$ ) is for splitting training (70%) and test (30%) data, while the  
86 inner loop ( $k = 10$ ) is for hyperparameters tuning. The generalization performance of the  
87 model was obtained from the nested cross-validation procedure by taking the average for

88 each metric over all the outer-loop folds. The area under the curve (AUC) of the Receiver  
89 Operating Characteristic curve was used as a metric to assess model performance. Moreover,  
90 the ridge logistic regression was interpreted, and adjusted odds ratios (aORs) with their  
91 corresponding 95% confidence intervals (CIs) were computed based on regression  
92 coefficients and standard error. Specifically, a ridge logistic regression model was first  
93 trained on the whole dataset using a 10-fold cross-validation procedure to select the best-  
94 performing hyperparameters. Subsequently, using the optimal set of hyperparameters, we  
95 fitted the  $\ell_2$ -penalized logistic regression model on the whole dataset to estimate the  
96 regression coefficients for each clinical covariate. Model training and validation were  
97 conducted using the *caret* package (version 6.0-94)<sup>7</sup> in R version 4.3.2. Before the analyses,  
98 categorical variables were dummy encoded, while continuous variables were centered and  
99 scaled.

## 100 **Results**

### 101 *Baseline characteristics*

102 From April 1<sup>st</sup>, 2018 to March 31<sup>st</sup>, 2019, there were 171 preterm newborns with gestational  
103 age < 32 weeks admitted to the NICU of Children Hospital 1. One had severe congenital  
104 heart disease, one had hydrocephalus, five cases had congenital gastrointestinal anomalies,  
105 and 46 were admitted after 72 hours of age. There were a total of 118 patients enrolled in the  
106 study: 28/118 (23.7%) patients were diagnosed with PH, and 21/28 (75%) patients in the PH  
107 group were extremely preterm newborns. The male/ female ratio was 0.96. Other baseline  
108 parameters comparing patients with vs. without PH are depicted in Table 1.

### 109 *Clinical manifestations*

110 The median time for the onset of PH is 47 (32.5-73) hours. The earliest and latest cases in the  
111 PH group happened at 28 hours and 144 hours, respectively. It took 38 (26-48.5) hours from  
112 the first dose of surfactant to PH manifestation.

113 The main clinical characteristics of the enrolled patients are also described in Table 1. The  
114 analysis of neonatal factors showed that newborns with PH had lower gestational age and  
115 birth weight ( $p < 0.001$ ). Additionally, infants in the PH group were more likely to be  
116 intubated in the first 24 hours, treated with surfactant, had been transfused, and had  
117 coagulation problems.

118 Risk factors for PH in this cohort were analyzed via a logistic regression model. The model  
119 exhibited considerable performance in classifying patients who underwent PH and those who  
120 did not [AUC and standard deviation (SD) from the nested cross-validation =  $0.863 \pm 0.065$ ]  
121 (Figure 1). The aORs of clinical covariates and their corresponding 95% CIs were presented  
122 in Figure 2 and Table 2. Three covariates were significantly associated with PH. In detail,  
123 patients who had coagulation dysfunction in the first 3 days increased the odds of acquiring  
124 PH with an aOR = 7.242 (95% CI = 1.838-28.542). In the same vein, blood transfusion prior  
125 to PH in the first 3 days (aOR = 5.394, 95% CI = 1.243-23.395) and intubation in the first 24  
126 hours (aOR = 4.594, 95% CI = 1.200-17.593) were positively associated with undergoing  
127 PH.

128 Short-term outcomes between PH and no-PH group are described in Table 3. Newborns  
129 who had PH showed a higher mortality rate (64.3% vs 25.6%,  $p = 0.001$ ). Grade II to IV  
130 intraventricular hemorrhage was more frequent in the group with PH (32.1% vs 4.4%,  
131  $p = 0.001$ ). Patients in the PH group needed a longer time of invasive ventilation than those in  
132 the no-PH group.

### 133 **Discussion**

134 PH is thought to occur in up to 4% to 12% of VLBW infants<sup>4</sup>. Similarly, the incidence of PH  
135 was 54/1350 (4%) in a prospective cohort study by Gezmu et al., which was conducted in a  
136 tertiary-level hospital in Botswana that included 1350 newborns enrolled during a 2-year  
137 period<sup>8</sup>. The population of that study had a mean (SD) birth weight was 2154 ( $\pm 997.5$ ) grams



138 and a gestational age was 34.3 ( $\pm 4.7$ ) weeks. However, the incidence of PH in our center  
139 accounts for 23.7% among newborns with gestational age at birth below 32 weeks. The mean  
140 gestational age of our patients is lower than those of Gezmu's study (25.5 weeks vs. 34.3  
141 weeks), and it may affect the rate of PH.

142 The mean age of onset of PH varied between 40 - 72 hours<sup>9,10</sup>. More than 80% of cases of PH  
143 onset within 3 days of life with a median of 40 hours<sup>10</sup>. In 2013, a study by Yen TA et al.  
144 demonstrated that the mean age of infants who have birth weight < 1500gr with PH  
145 occurrence was  $2.4 \pm 1.3$  days<sup>11</sup>. Additionally, the study of Wang et al. revealed that the  
146 median age of PH occurrence was 3 (2-4,5) days in extremely low birth weight (ELBW)  
147 infants<sup>3</sup>. Similarly, the mean time for the onset of PH was 47 hours after birth in our study.

148 In our study, we assessed risk factors for PH by multivariate analysis and identified that  
149 intubation in the first 24 hours, blood transfusion prior to PH in the first 3 days, and  
150 coagulation problems in the first 3 days were independently associated factors for PH.  
151 Similar to our result, Ferreira et al. also found that preterm infants who needed intubation in  
152 the delivery room were associated with PH occurrence<sup>4</sup>. As can be seen in our study design,  
153 Children's Hospital 1 has a level IV NICU, where obtaining patients' referrals from nearby  
154 regional hospitals and intubation may be indicated conditionally for airway control while  
155 transferring. The need for intubation and positive pressure ventilation can cause excessive  
156 alveolar distension and lead to stress damage to the alveolar capillaries, which may activate  
157 the genesis of PH<sup>12</sup>.

158 In the multiple logistic regression, we found there is an association between PH and usage of  
159 blood products prior to PH in the first 3 days of life. Transfusion of blood products is thought  
160 to increase pulmonary capillary pressure, leading to stress injury of the capillary wall<sup>4</sup>.  
161 Additionally, a clinical disorder which is known as transfusion-related acute lung injury  
162 (TRALI) can be detected in patients who experience a great deal of stress, which may impact

163 the occurrence of PH<sup>13</sup>. TRALI begins with increasing the levels of interleukin-8 and  
164 interleukin-6, which results in neutrophil recruitment to the pulmonary vasculature, and  
165 pulmonary edema can eventually happen. The onset of TRALI can be during or from 6–72  
166 hours after a transfusion.

167 Coagulation dysfunction in the first 3 days of life also showed an association with PH in a  
168 multivariate logistic regression model. In 2021, a study by Jing Li et al. found that PDA,  
169 coagulopathy, and 10-minute Apgar Score were risk factors for PH<sup>14</sup>. Coagulation  
170 dysfunction in preterm infants can be related to hypoxia due to respiratory distress syndrome  
171 (RDS) and sepsis. On the other hand, preterm infants may need surfactant replacement in the  
172 case of RDS, and surfactant was reported to have an impact on the impairment of coagulation  
173 in-vitro<sup>15</sup>.

174 Prior studies reported the association of PDA with the occurrence of PH<sup>1,14</sup>. From 2 days of  
175 age, the reduction of pulmonary vascular resistance leads to increased left-to-right shunting  
176 through PDA and pulmonary blood flow and results in elevating the pressure state of the  
177 pulmonary vessels, which may compromise cardiac function with an increased risk of PH.  
178 However, we do not reveal this association when analyzed in a multivariate logistic  
179 regression model. It can be explained that the preterm infants less than 28 weeks in our center  
180 had been given prophylactic treatment with acetaminophen and fluid restriction to reduce the  
181 risk of hspDA.

182 Several studies showed that surfactant replacement may increase the risk of PH<sup>2,4,16</sup>, whereas  
183 other studies reported no impact of surfactant replacement<sup>3,17</sup>. In the current study, our data  
184 showed that PH was associated with surfactant replacement within 24 hours of age and  
185 repeated surfactant therapy. It is reasonable to postulate that the illness of infants who need  
186 surfactant are clinically severe and more likely to have PH than those who do not need

187 surfactant. However, multivariate logistic regression analysis revealed no interactive effects  
188 of surfactant and PH. This is in agreement with some of the previous reports<sup>17,18</sup>.

189 For short-term outcomes of PH, we found a strong association between PH and mortality  
190 rate, similar to previous studies<sup>2,5,17</sup>. Another significant outcome observed in this study was  
191 IVH. PH and IVH were reported as a result of hemodynamic instability and coagulation  
192 disorders<sup>8</sup>. The study by Wang TT et al. found that the IVH rate of the group of extremely  
193 low birth weight infants (ELBWIs) with PH was significantly higher than those of the group  
194 of ELBWIs without PH<sup>3</sup>. In our study, the rate of grade II-IV IVH was significantly higher in  
195 infants with PH than those without PH (32.1% and 4.4%, respectively,  $P < 0.001$ ). On the  
196 other hand, IVH can also be found in 24.4% of extremely preterm infants with hsPDA, but  
197 there has been no evidence that the presence of a hsPDA is associated with a higher  
198 probability of IVH. As mentioned above, the incidence of hsPDA was 48.3% among our  
199 patients, and it was higher in the PH group compared to the no-PH group but not statistically  
200 significant.

201 Supportive management of PH was positive ventilation, blood transfusion, and vasopressor  
202 administration<sup>19</sup>. In our study, the duration of invasive ventilation and nCPAP support was  
203 significantly longer in the PH group than in the no-PH group ( $p=0.001$ ). However, there were  
204 no significant differences in NICU stay between surviving infants in the PH and no-PH  
205 groups ( $p=0.6$ ).

206 Our unit is a level IV NICU that primarily cares for out-born infants transferred from  
207 neonatal units in the Obstetric Hospitals in Ho Chi Minh City and the surrounding regions.

208 This was a retrospective study in a single center, which may not be able to highlight all the  
209 associated factors of PH in very preterm newborns due to the limited data and small sample  
210 size. However, analyzing the risk factors of PH will help physicians to understand better why  
211 PH occurs and how to prevent it.

212 **Conclusion**

213 PH is a severe and dreadful complication that has a common onset at 2-4 days of age in the  
214 population of newborns with <32 weeks, particularly in extremely preterm infants. The risk  
215 of PH increases with decreasing gestational age of live-born infants, especially those who  
216 have been intubated for mechanical ventilation on the first day of life, have coagulation  
217 problems within the first 3 days of life, and have blood products transfusion within the first 3  
218 days. IVH should be investigated as soon as the diagnosis of PH is confirmed.

219 **Acknowledgments**

We would like to acknowledge all participants who were enrolled in the study and their parents and families. We would like to acknowledge our supporting colleagues at the University of Medicine and Pharmacy at Ho Chi Minh City and Children's Hospital 1 in Ho Chi Minh City.

**Funding**

The authors received no financial support for the research, authorship, and publication of this article.

**Author contributions**

Conceptualization: TTN, GTMT; Data collection: GTMT, TTN; Formal analysis: GTMT, TTN, NPMN, NPL, DNN; Methodology: TTN, GTMT, NPMN, NPL, DNN; Supervision: TTN; Writing draft manuscript: GTMT, TTN, NPMN, NPL, DNN; Review and edit manuscript: GTMT, TTN, NPMN, NPL, DNN; Approve the final manuscript: all authors.

**Conflicting Interests**

The authors have no conflicts of interest to declare.

**Data availability statement:**

Data for this study are contained within patient medical records and are not publicly available due to privacy restrictions. The data are available from the corresponding author, Thu-Tinh Nguyen, upon reasonable request.

## References

- 220 1. Zahr, R. A., Ashfaq, A. & Marron-Corwin, M. Neonatal Pulmonary Hemorrhage.  
221 *Neoreviews* **13**, e302–e306 (2012).
- 222 2. Ahmad, K. A., Bennett, M. M., Ahmad, S. F., Clark, R. H. & Tolia, V. N. Morbidity  
223 and mortality with early pulmonary haemorrhage in preterm neonates. *Arch Dis Child*  
224 *Fetal Neonatal Ed* **104**, F63–F68 (2019).
- 225 3. Wang, T.-T., Zhou, M., Hu, X.-F. & Liu, J.-Q. Perinatal risk factors for pulmonary  
226 hemorrhage in extremely low-birth-weight infants. *World Journal of Pediatrics* **16**,  
227 299–304 (2020).
- 228 4. Ferreira, C. H., Carmona, F. & Martinez, F. E. Prevalence, risk factors and outcomes  
229 associated with pulmonary hemorrhage in newborns. *J Pediatr (Rio J)* **90**, 316–322  
230 (2014).
- 231 5. Cao, Z.-L. *et al.* [Pulmonary hemorrhage in very low birth weight infants: risk factors  
232 and clinical outcome]. *Zhongguo Dang Dai Er Ke Za Zhi* **24**, 1117—1123 (2022).
- 233 6. Šinkovec, H., Heinze, G., Blagus, R. & Geroldinger, A. To tune or not to tune, a case  
234 study of ridge logistic regression in small or sparse datasets. *BMC Med Res Methodol*  
235 **21**, 199 (2021).
- 236 7. Kuhn, M. Building Predictive Models in *R* Using the **caret** Package. *J Stat Softw* **28**,  
237 (2008).
- 238 8. Gezmu, A. M. *et al.* Pulmonary hemorrhage and associated risk factors among  
239 newborns admitted to a tertiary level neonatal unit in Botswana. *Front Pediatr* **11**,  
240 (2023).
- 241 9. Finlay, E. R. & Subhedar, N. V. Pulmonary haemorrhage in preterm infants. *Eur J*  
242 *Pediatr* **159**, 870–871 (2000).

- 243 10. Tomaszewska, M. *et al.* Pulmonary Hemorrhage. *Arch Pediatr Adolesc Med* **153**, 715  
244 (1999).
- 245 11. Yen, T.-A. *et al.* Short-term Outcome of Pulmonary Hemorrhage in Very-Low-Birth-  
246 Weight Preterm Infants. *Pediatr Neonatol* **54**, 330–334 (2013).
- 247 12. Berger, T. M., Allred, E. N. & Van Marter, L. J. Antecedents of Clinically Significant  
248 Pulmonary Hemorrhage Among Newborn Infants. *Journal of Perinatology* **20**, 295–  
249 300 (2000).
- 250 13. Marik, P. E. & Corwin, H. L. Acute lung injury following blood transfusion:  
251 Expanding the definition. *Crit Care Med* **36**, 3080–3084 (2008).
- 252 14. Li, J., Xia, H., Ye, L., Li, X. & Zhang, Z. Exploring prediction model and survival  
253 strategies for pulmonary hemorrhage in premature infants: a single-center,  
254 retrospective study. *Transl Pediatr* **10**, 1324–1332 (2021).
- 255 15. Strauss, T. *et al.* Surfactant impairs coagulation in-vitro: A risk factor for pulmonary  
256 hemorrhage? *Thromb Res* **132**, 599–603 (2013).
- 257 16. Chen, Y. *et al.* Pulmonary hemorrhage in very low birthweight infants: Risk factors  
258 and management. *Pediatrics International* **54**, 743–747 (2012).
- 259 17. Berger, T. M., Allred, E. N. & Van Marter, L. J. Antecedents of Clinically Significant  
260 Pulmonary Hemorrhage Among Newborn Infants. *Journal of Perinatology* **20**, 295–  
261 300 (2000).
- 262 18. De Carolis, M. P. *et al.* Pulmonary haemorrhage in infants with gestational age of less  
263 than 30 weeks. *Eur J Pediatr* **157**, 1037–1038 (1998).
- 264 19. Barnes, M. E. *et al.* Pulmonary haemorrhage in neonates: Systematic review of  
265 management. *Acta Paediatr* **111**, 236–244 (2022).
- 266
- 267

268 **Table 1:** Comparison of clinical characteristics between patients with and without pulmonary

| Variables                                                   | aOR                        | 95% Confidence Interval             | P-value            |
|-------------------------------------------------------------|----------------------------|-------------------------------------|--------------------|
| Characteristics                                             |                            |                                     |                    |
| Gestational age (n (%) or median [25-75pt])                 | Pulmonary hemorrhage 0.435 | No Pulmonary hemorrhage 0.148-1.279 | p-value 0.130      |
| Birth weight                                                | n = 28 0.956               | n = 90 0.319-2.867                  | 0.937              |
| Not given antenatal steroids                                | 1.097                      | 0.287-4.201                         | 0.892              |
| Gender (female)                                             | 15 (53.6)                  | 45 (50.0)                           | 0.741              |
| Gestational age (weeks)                                     | 25.5 [25-27.8]             | 28 [27-30]                          | 0.001*             |
| Birth weight (g)                                            | 725 [657.5-1000]           | 1100 [947.5-1400]                   | 0.001*             |
| Small for gestational age                                   | 3 (10.7)                   | 5 (5.6)                             | 0.392              |
| Not given antenatal steroids                                | 22 (78.6)                  | 51 (56.7)                           | 0.046              |
| Cervical incompetence                                       | 2 (7.1)                    | 7 (7.8)                             | 1.00               |
| Intrapartum mother's fever                                  | 2 (7.1)                    | 7 (7.8)                             | 1.00               |
| Intubation within first 24 hours                            | 18 (64.3)                  | 22 (24.4)                           | 0.001              |
| Surfactant therapy within first 24 hours                    | 23 (82.1)                  | 41 (45.6)                           | 0.001              |
| Given second surfactant dose                                | 6 (21.4)                   | 2 (2.2)                             | 0.002              |
| Blood transfusion prior PH within the first 3 days of life. | 20 (71.4)                  | 8 (8.9)                             | 0.001              |
| Coagulopathy within the first 3 days                        | 22 (78.6)                  | 8 (8.9)                             | 0.001 <sup>†</sup> |
| Hemodynamically significant PDA                             | 17 (60.7)                  | 40 (44.4)                           | 0.132 <sup>†</sup> |
| Platelet count < 100.000/mm <sup>3</sup> ‡                  | 7 (25.0)                   | 8 (8.9)                             | 0.046              |

269 hemorrhage.

270 \* *Mann-Whitney test* † *Chi-square test*, ‡: *Fisher's test*.

271 *Abbreviation: PDA (Patent Ductus Arteriosus), PH (Pulmonary Hemorrhage)*



|                                                               |       |              |       |
|---------------------------------------------------------------|-------|--------------|-------|
| Intubation within first 24 hours                              | 4.594 | 1.200-17.593 | 0.026 |
| Surfactant therapy within first 24 hours                      | 0.890 | 0.217-3.650  | 0.871 |
| Given second surfactant dose                                  | 1.250 | 0.195-8.005  | 0.813 |
| Blood transfusion prior PH within the first 3 days<br>of life | 5.394 | 1.243-23.395 | 0.024 |
| Coagulopathy within the first 3 days                          | 7.242 | 1.838-28.542 | 0.005 |
| Hemodynamically significant PDA                               | 2.434 | 0.594-9.966  | 0.216 |
| PDA prophylaxis                                               | 0.394 | 0.082-1.899  | 0.246 |
| PDA ligation                                                  | 0.452 | 0.108-1.887  | 0.276 |
| Platelet count < 100.000/mm <sup>3</sup>                      | 0.790 | 0.166-3.758  | 0.767 |

272 **Table 2:** Adjusted odds ratio and 95% confidence intervals estimated from ridge logistic  
273 regression model

274

275 **Table 3:** Short-term outcomes of pulmonary hemorrhage

| Variables                                                   | Pulmonary hemorrhage<br>(n = 28) | No Pulmonary hemorrhage<br>(n = 90) | p-value |
|-------------------------------------------------------------|----------------------------------|-------------------------------------|---------|
| Death, n (%) <sup>*</sup>                                   | 18 (64.3)                        | 23 (25.6)                           | 0.001   |
| Intraventricular hemorrhage grade II-IV, n (%) <sup>†</sup> | 9 (32.1)                         | 4 (4.4)                             | 0.001   |
| Moderate- severe BPD, n (%) <sup>†</sup>                    | 5 (17.9)                         | 11 (12.2)                           | 0.528   |
| Stage 3 ROP, n (%) <sup>†</sup>                             | 2 (7.1)                          | 7 (7.8)                             | 1.00    |
| Length of invasive ventilation (days) <sup>‡</sup>          |                                  |                                     |         |
| IMV                                                         | 5.4 (1.12; 14.4)                 | 0.5 (0; 4)                          | 0.001   |
| HFO                                                         | 1.75 (1; 6.75)                   | 0 (0; 1.56)                         | 0.001   |
| Length of using NCPAP (days) <sup>‡</sup>                   | 2 (0; 25)                        | 11 (3; 25)                          | 0.016   |
| NICU stay (days) <sup>‡</sup>                               | 21 (3.75; 52)                    | 24 (7; 50.25)                       | 0.604   |

276 <sup>\*</sup>Chi-square test, <sup>†</sup>Fisher's test, <sup>‡</sup>Mann-Whitney test.

277 Abbreviations: BPD (Bronchopulmonary Dysplasia), HFO (High-Frequency Oscillations),

278 IMV (Intermittent Mandatory Ventilation), NICU (Neonatal Intensive Care Unit), ROP

279 (Retinopathy of Prematurity).

280

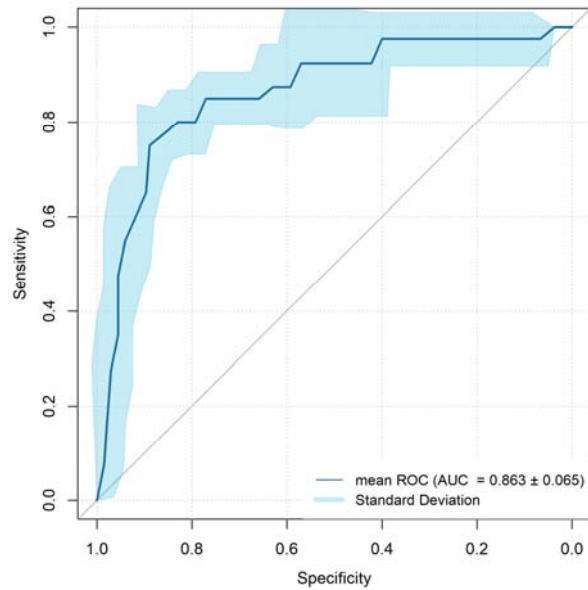

281

282 **Figure 1.** The receiver operating characteristic curve of the ridge logistic regression model  
283 classifies patients who acquired PH and those who did not. The total sample size was 118  
284 patients ( $N_{\text{Yes}} = 28$ ,  $N_{\text{No}} = 90$ ).

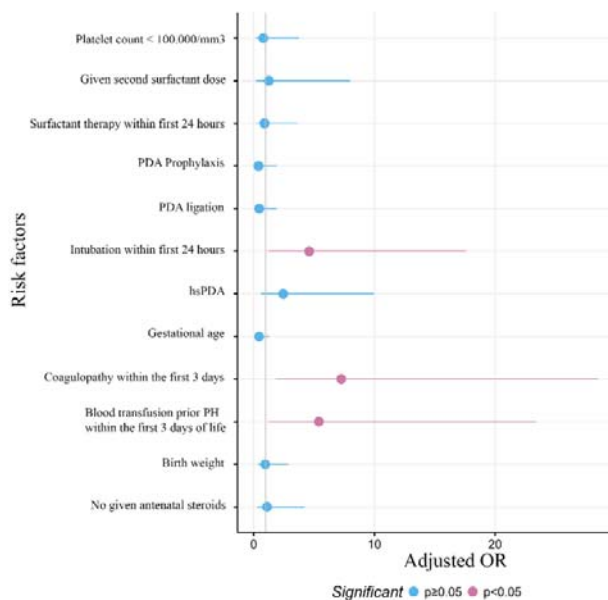

285

286 **Figure 2.** Odds ratio of factors associated with pulmonary hemorrhage. Adjusted odds ratios

287 and corresponding confidence intervals estimated from the ridge logistic regression model.

288 The confidence level is 95%, and non-significant results are presented in blue.
